# Supplementary material
Source: Springer Nature journal article supplement (https://www.springermedizin.de/resource/supplementary/12935_2010_257_MOESM13_ESM.pdf/9540160)

2D

3D

Control

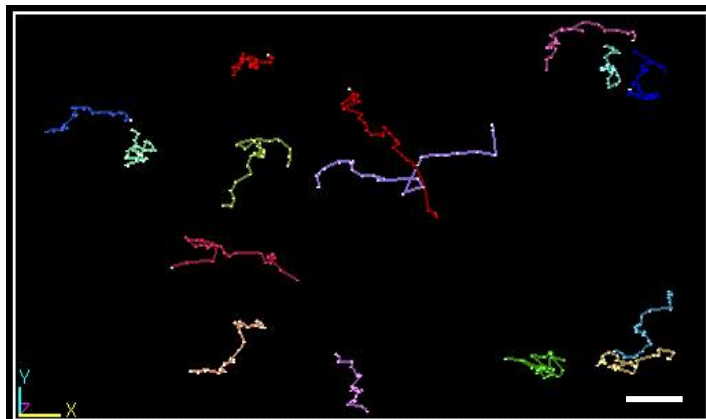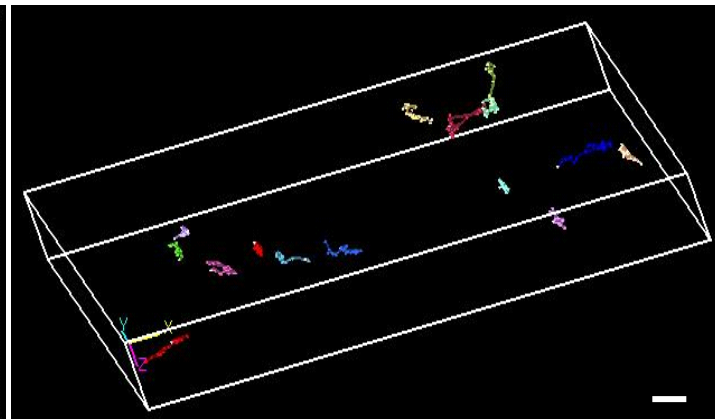

Doxorubicin  
5 nM

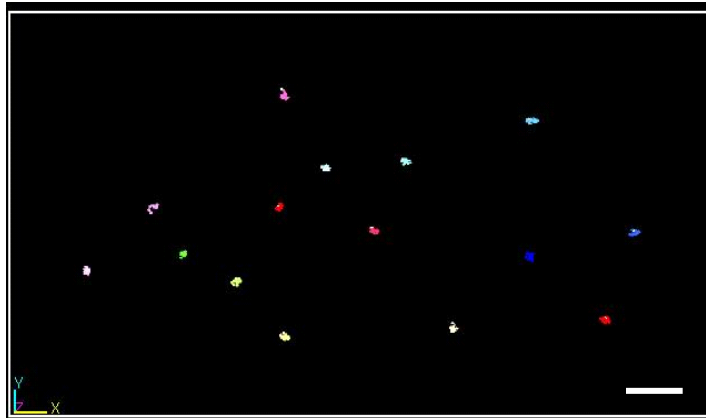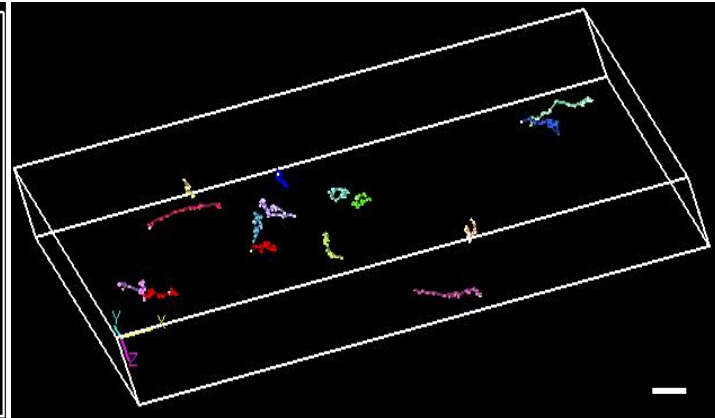

Supplement: MOESM13 [file 9540160]
